# Supplementary material for: Global landscape of protein complexes in the yeast Saccharomyces cerevisiae
Source: Springer Nature journal article supplement (doi:10.1038/nature04670), 2006-03-01
Supplement: 41586_2006_BFnature04670_MOESM2_ESM.pdf [file 41586_2006_BFnature04670_MOESM2_ESM.pdf]

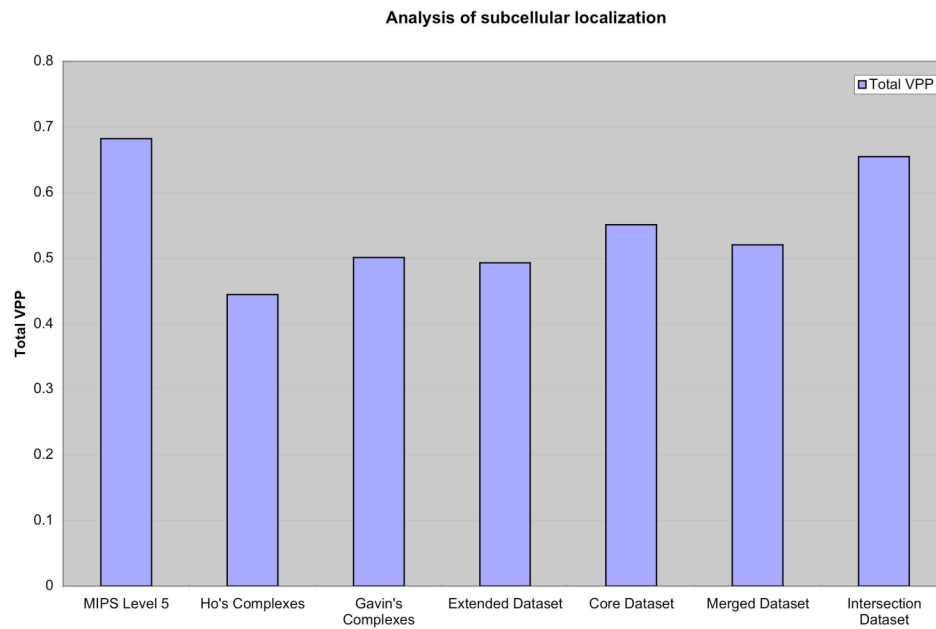

Figure S1. Positive prediction values (Sylvain Brohee, manuscript in preparation) for large-scale datasets using subcellular localization data from Huh et al., 2003 Nature 425, 671.

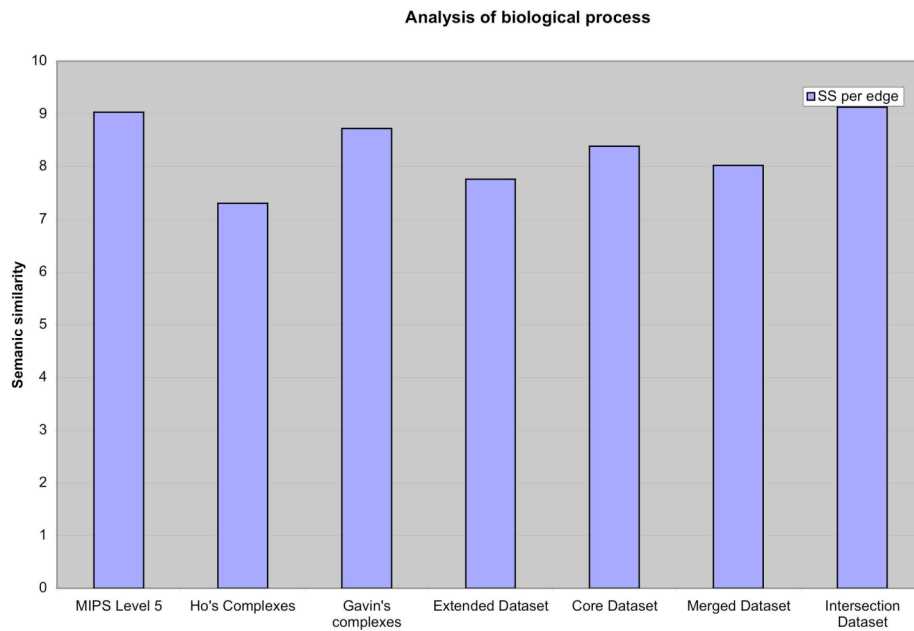

Figure S2. Semantic similarity scores (Lord et al. 2003 Bioinformatics 19, 1275) for large-scale datasets using GO biological process taxonomy ([www.geneontology.org](http://www.geneontology.org))

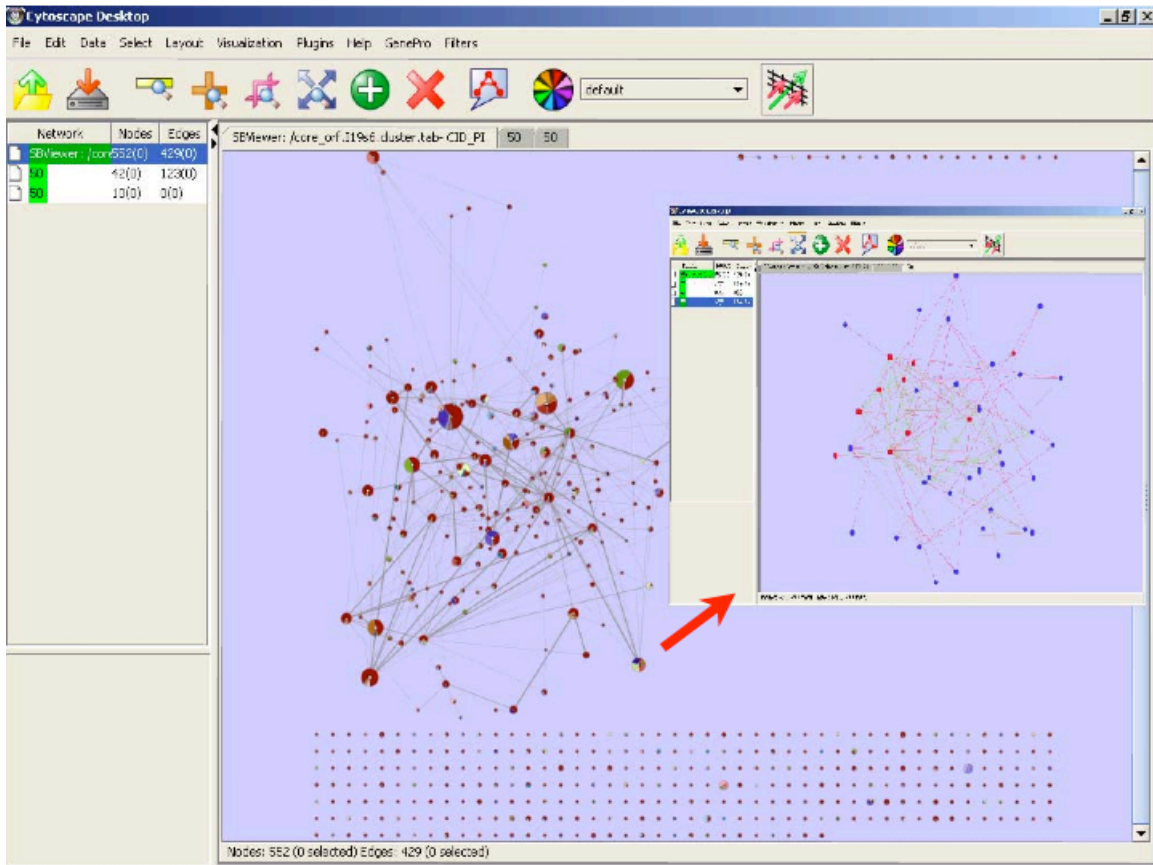

Figure S3. Screenshot of Cytoscape/GenePro representation of Core protein complex network. Each node represents an individual complex. An individual complex (Predicted complex #50) is enlarged in inset. Red indicates members of the complex while blue indicates neighbours of degree one.

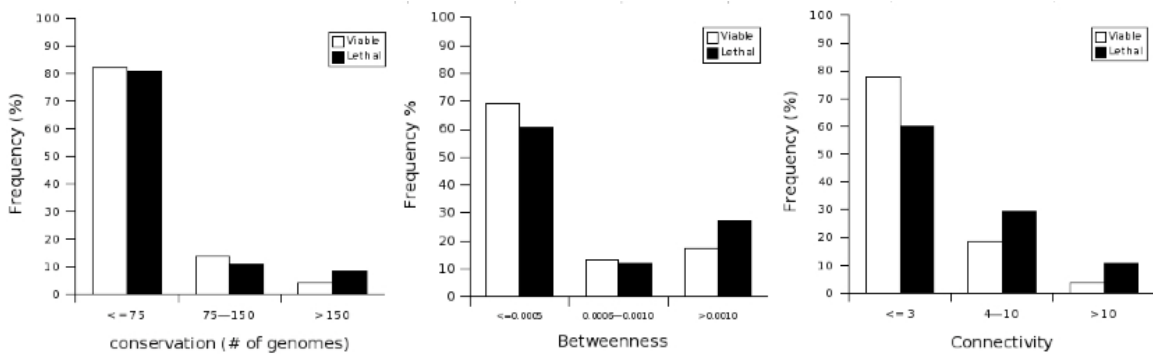

Figure S4. Essential genes are more conserved, connected and have more betweenness than non-essential genes

A.

|                   | Protein      | ORF       | Essential | Size (kDa) | Tagged subunits |          |          |           |          |
|-------------------|--------------|-----------|-----------|------------|-----------------|----------|----------|-----------|----------|
|                   |              |           |           |            | Rpb1-TAP        | Rpb3-TAP | Rpb9-TAP | Rpb11-TAP | Iwr1-TAP |
| RNA Polymerase II | <i>Rpb1</i>  | Ydl140c   | Yes       | 192        | +               | +        | +        | +         | +        |
|                   | <i>Rpb2</i>  | Yor151c   | Yes       | 139        | +               | +        | +        | +         | +        |
|                   | <i>Rpb3</i>  | Yil021w   | Yes       | 35         | +               | +        | +        | +         | +        |
|                   | <i>Rpb4</i>  | Yjl140w   | No        | 25         | +               | +        | +        | +         | +        |
|                   | <i>Rpb5</i>  | Ybr154c   | Yes       | 25         | +               | +        | +        | +         | +        |
|                   | <i>Rpb6</i>  | Ypr187w   | Yes       | 18         | +               | +        | +        | +         | +        |
|                   | <i>Rpb7</i>  | Ydr404c   | Yes       | 19         | +               | +        | +        | +         | +        |
|                   | <i>Rpb8</i>  | Yor224c   | Yes       | 17         | -               | +        | +        | +         | +        |
|                   | <i>Rpb9</i>  | Ygl070c   | No        | 14         | +               | +        | +        | +         | +        |
|                   | <i>Rpb10</i> | Yor210w   | Yes       | 8          | +               | +        | +        | +         | +        |
|                   | <i>Rpb11</i> | Yol005c   | Yes       | 14         | +               | +        | +        | +         | +        |
|                   | <i>Rpb12</i> | Yhr143w-a | Yes       | 8          | -               | +        | +        | -         | -        |
| TFIIF             | Tfg1         | Ygr186w   | Yes       | 82         | +               | +        | +        | +         | +        |
|                   | Tfg2         | Ygr005c   | Yes       | 47         | +               | +        | +        | +         | +        |
|                   | Tfg3         | Ypl129w   | No        | 27         | -               | +        | +        | +         | -        |
| TFIIS             | Spt5         | Yml010w   | Yes       | 116        | +               | +        | +        | +         | +        |
|                   | Spt4         | Ygr063c   | No        | 11         | -               | -        | +        | +         | -        |
|                   | Dst1         | Ygl043w   | No        | 35         | +               | +        | +        | +         | +        |
|                   | Iwr1         | Ydl115c   | No        | 41         | +               | +        | +        | +         | +        |
|                   | Pwr1         | Ycr079c   | No        | 49         | -               | +        | +        | +         | -        |

B.

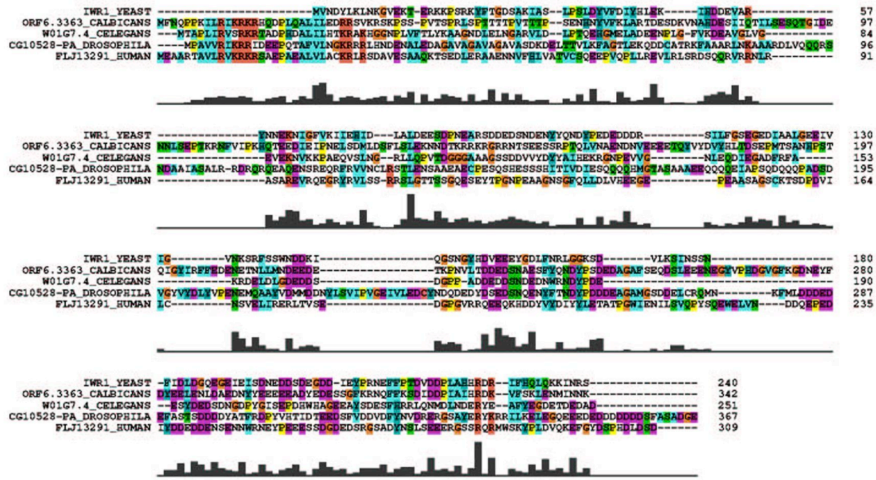

Figure S5. A. Summary of purifications using tagged Iwr1 and tagged unique subunits of RNA polymerase II. B. Amino acid alignment of Iwr1 (Ydl115c) sequence from various species.
