# Supplementary material for: Global landscape of protein complexes in the yeast Saccharomyces cerevisiae
Source: Springer Nature journal article supplement (doi:10.1038/nature04670), 2006-03-01
Supplement: 41586_2006_BFnature04670_MOESM3_ESM.pdf [file 41586_2006_BFnature04670_MOESM3_ESM.pdf]

# TAP Database Search

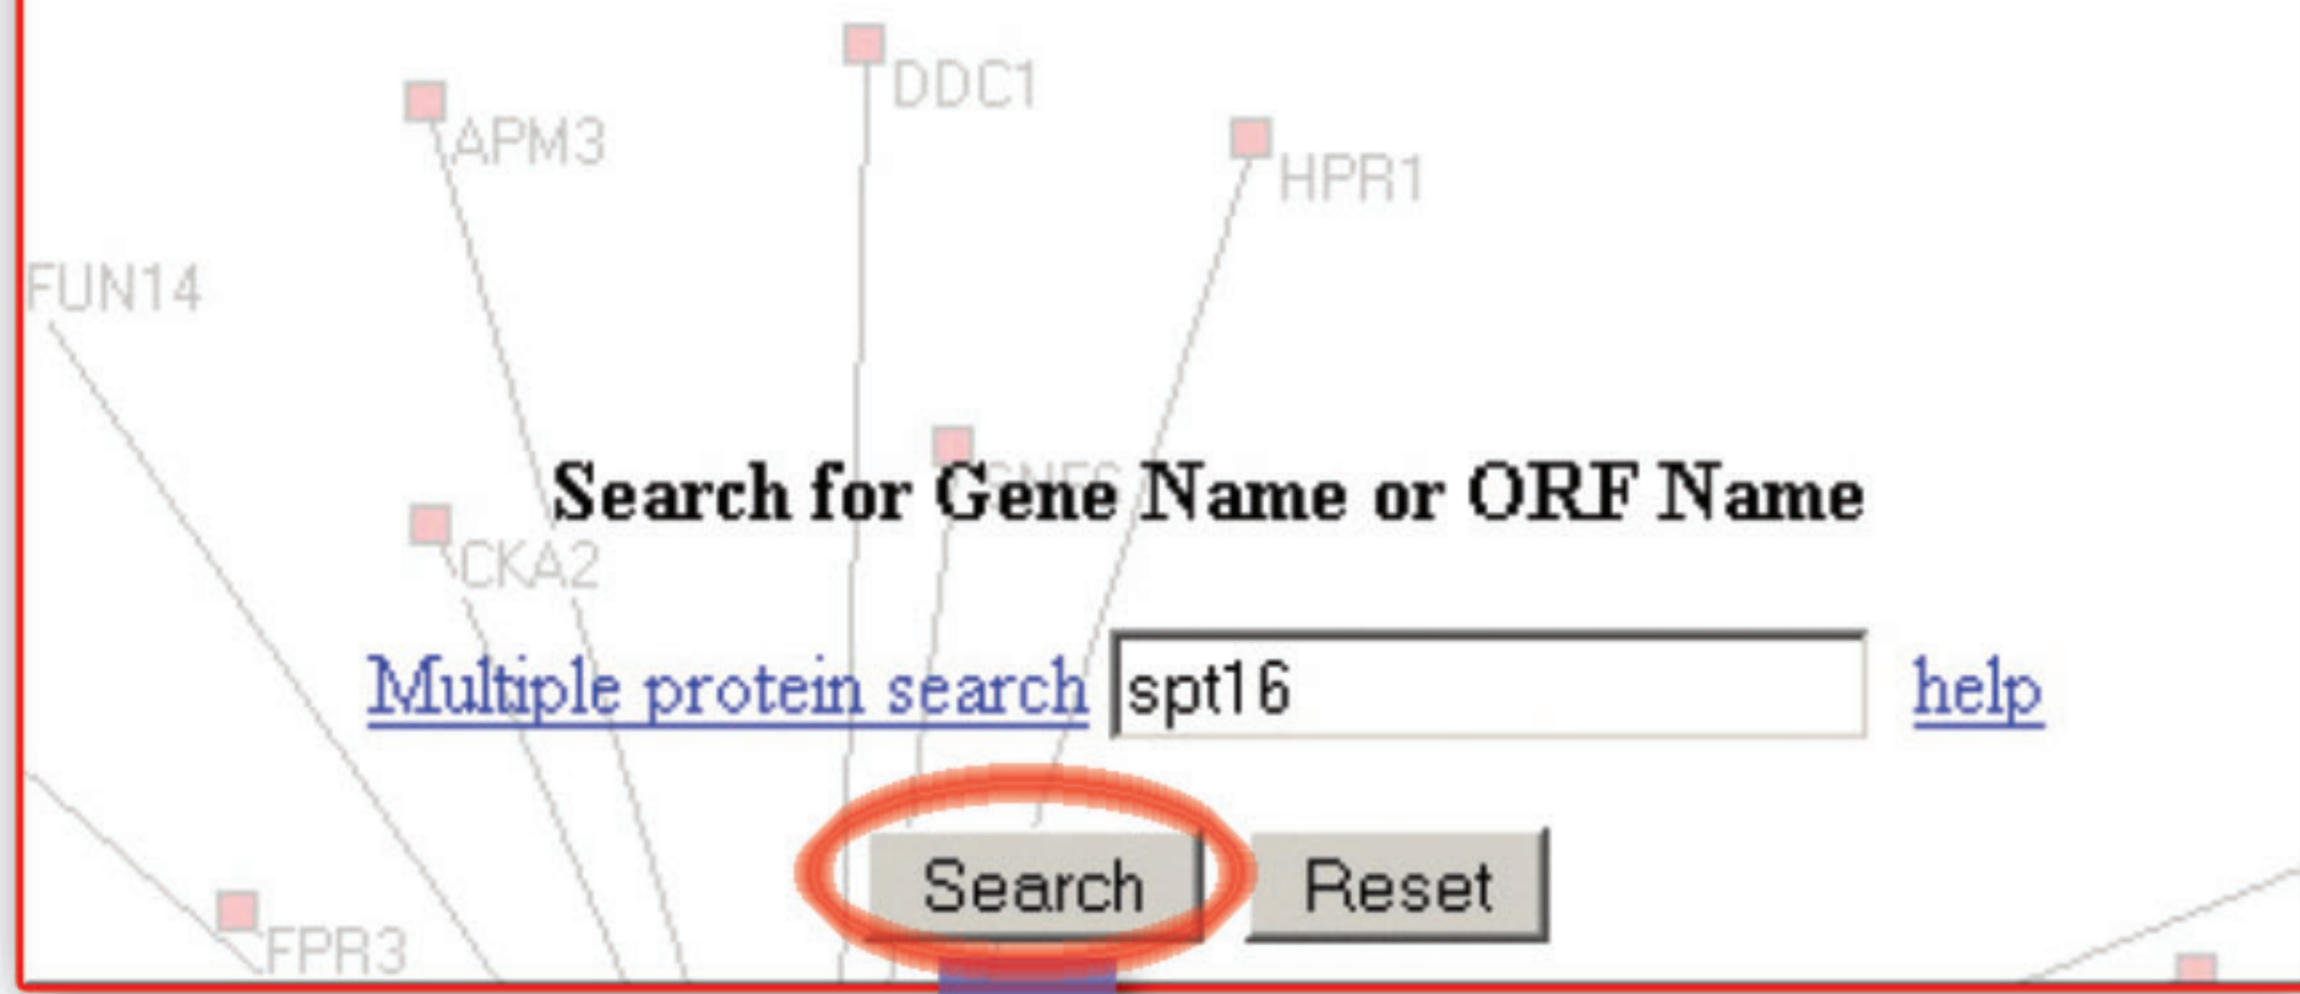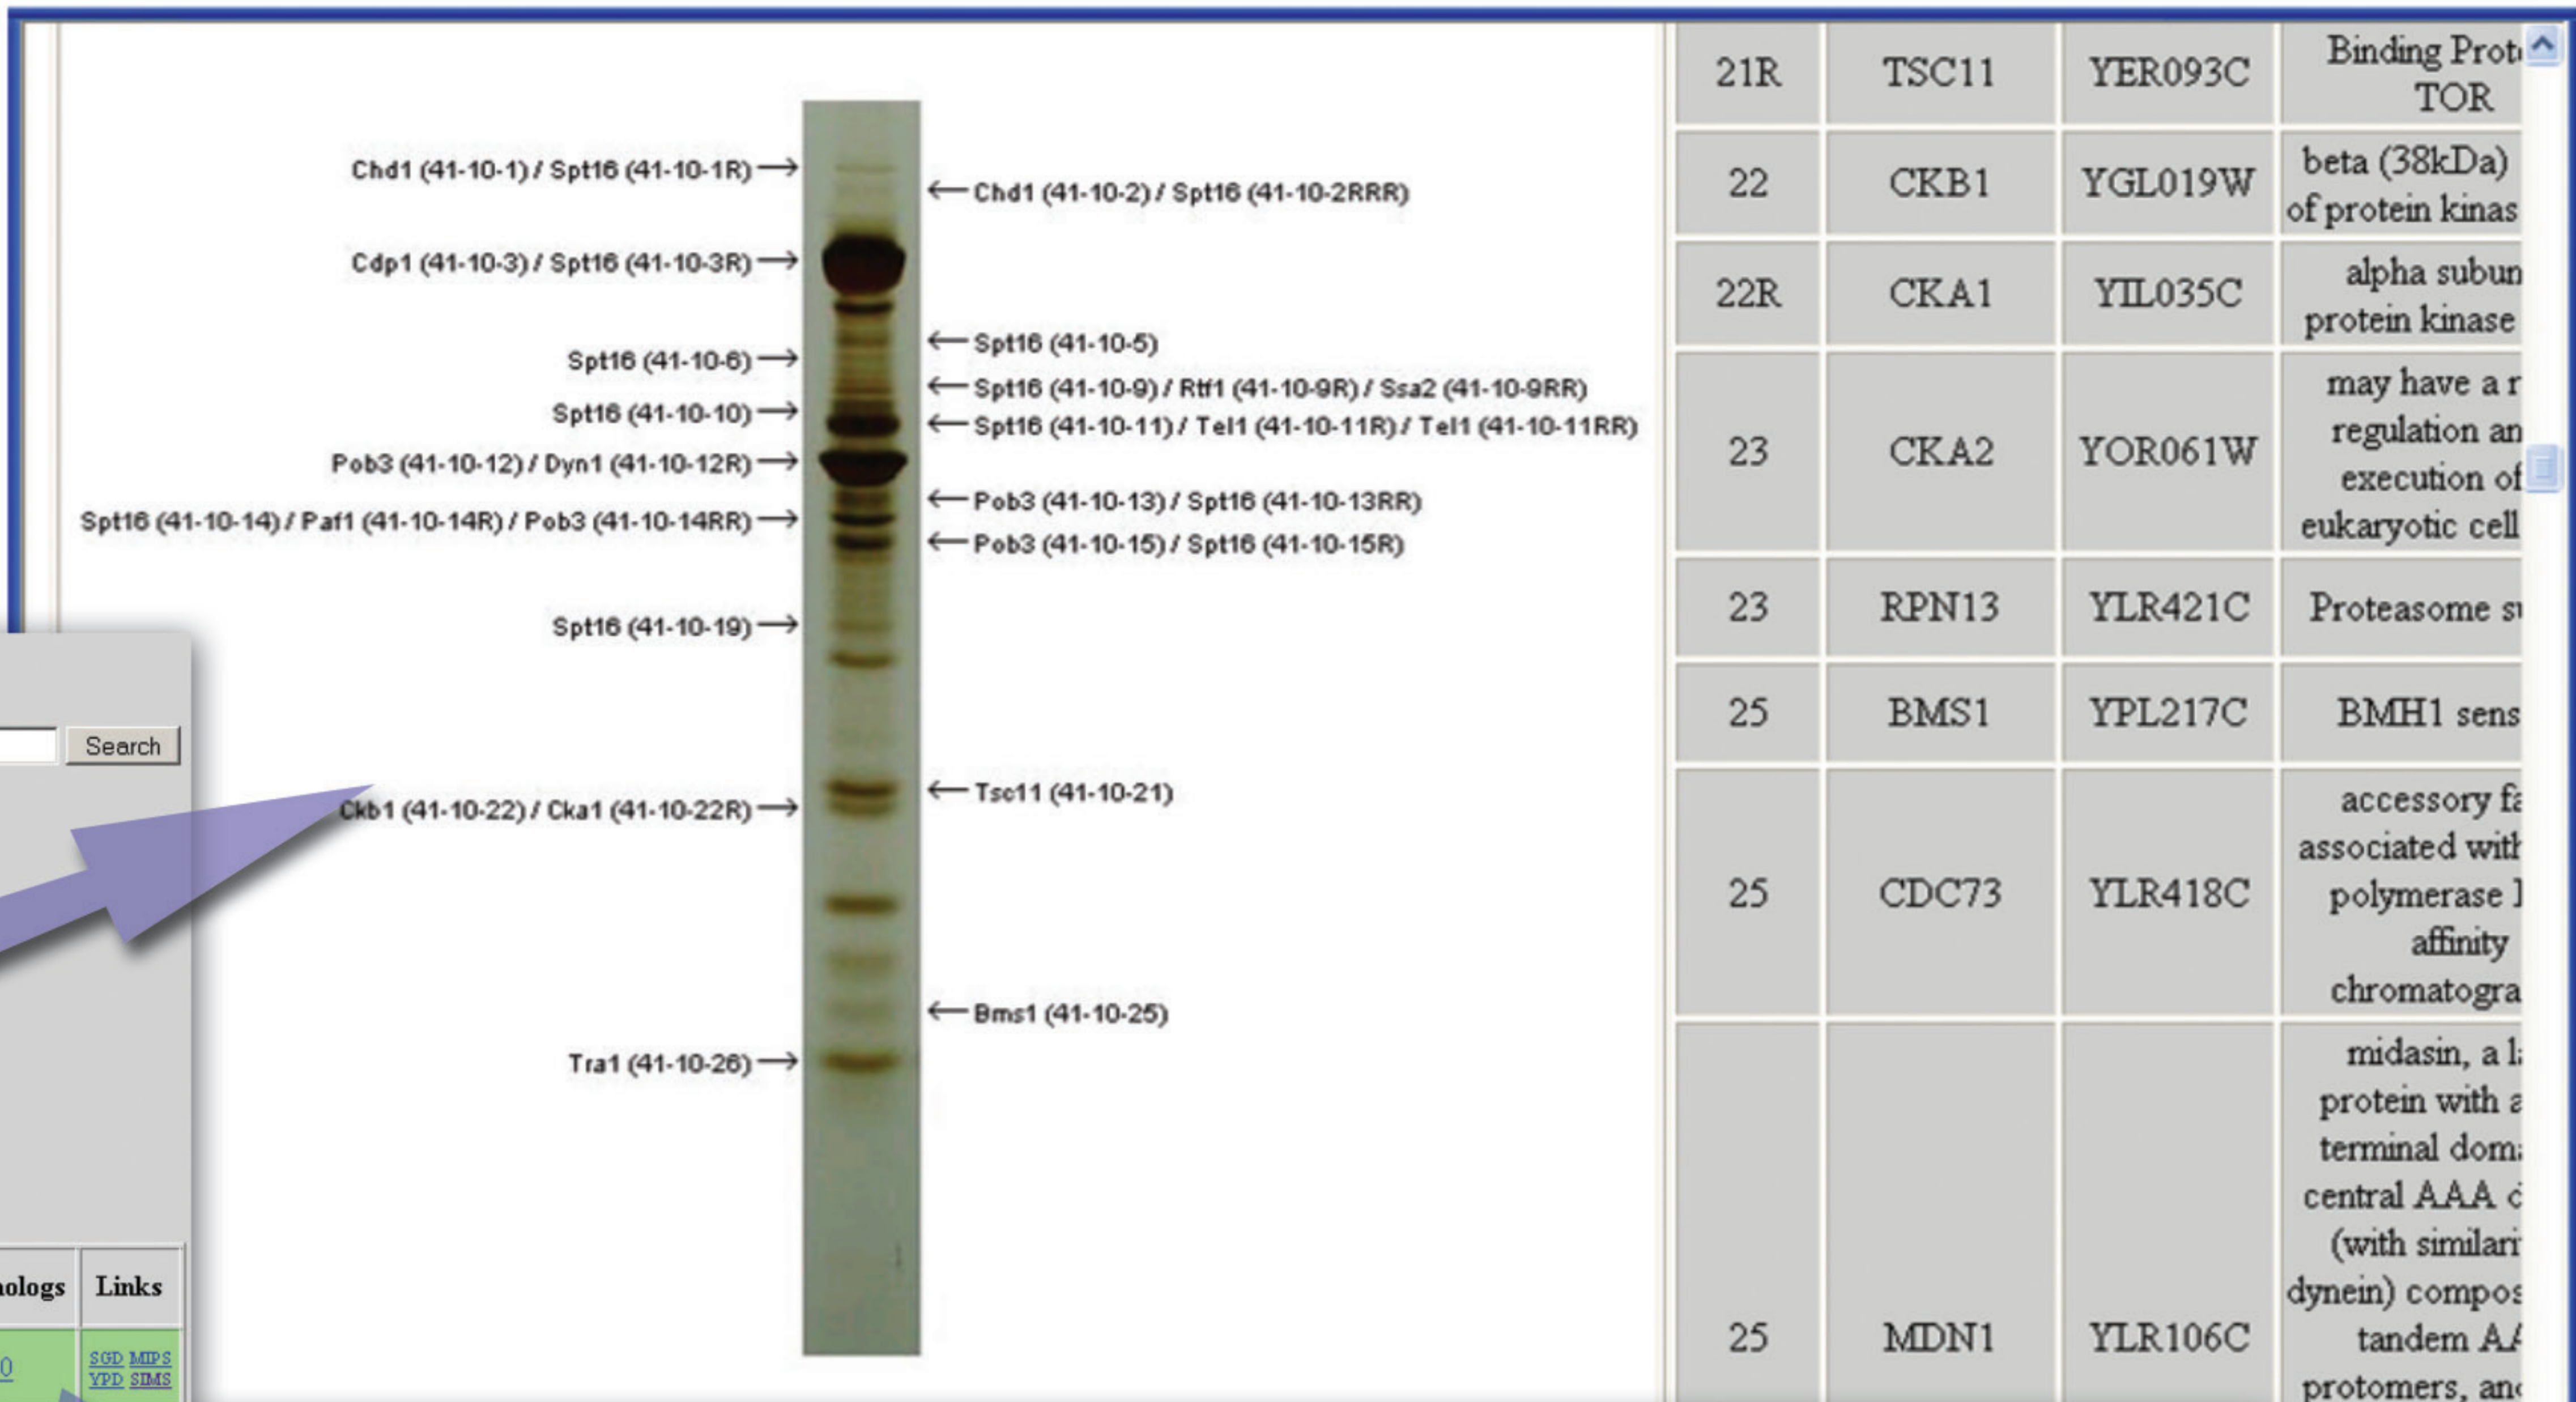

|     |       |         |                                                                                                                            |
|-----|-------|---------|----------------------------------------------------------------------------------------------------------------------------|
| 21R | TSC11 | YER093C | Binding Prob TOR                                                                                                           |
| 22  | CKB1  | YGL019W | beta (38kDa) of protein kinase                                                                                             |
| 22R | CKA1  | YIL035C | alpha subunit protein kinase                                                                                               |
| 23  | CKA2  | YOR061W | may have a r regulation an execution of eukaryotic cell                                                                    |
| 23  | RPN13 | YLR421C | Proteasome s                                                                                                               |
| 25  | BMS1  | YPL217C | BMH1 sens                                                                                                                  |
| 25  | CDC73 | YLR418C | accessory fa associated with polymerase I affinity chromatogra                                                             |
| 25  | MDN1  | YLR106C | midasin, a li protein with a terminal dom central AAA d (with similar dynein) compos tandem AA protomers, and terminal M-d |

Interaction View  
For bait SPT16(YGL207W) Search for Gene Name or ORF Name

Data filtered by Z\_SCORE >= 1.0 and Confidence value >= 90 %

| Gene Name | ORF Name | SGD Description                   | GO Annotation                                                                                                              | Homologs | Links             |
|-----------|----------|-----------------------------------|----------------------------------------------------------------------------------------------------------------------------|----------|-------------------|
| SPT16     | YGL207W  | global regulator of transcription | P RNA elongation from Pol II promoter<br>P chromatin modeling<br>P regulation of global transcription from Pol II promoter | 0        | SGD MIPS YPD SIMS |

Bait Common protein Possible cross contaminations

The following bound to SPT16(YGL207W) when it was used as bait. For details see LCMS data MalDI data for SPT16(YGL207W)

| Gene Name | ORF Name | SGD Description                                                                                                                                                        | Localization (Molecules/Cell) | Source | L_Score | #Peptides (%) | Sum of score | Max_Maldi | Homologs | Links  |
|-----------|----------|------------------------------------------------------------------------------------------------------------------------------------------------------------------------|-------------------------------|--------|---------|---------------|--------------|-----------|----------|--------|
| SPT16     | YGL207W  | global regulator of transcription                                                                                                                                      | nucleus (18500)               | GFP    | L       | 12/14         | 297(99.6)    | 29524.8   | 4.56     | 0      |
| POB3      | YML069W  | binds to catalytic subunit of DNA polymerase alpha (PolIp)                                                                                                             | nucleus (22400)               | GFP    | M       | 10/12         | 130(3.61)    | 469.51    | 6.53     | 1e-124 |
| PAF1      | YBR279W  | RNA polymerase II-associated, nuclear protein that may serve as both a positive and negative regulator of a subset of genes, perhaps operating in parallel with Gal1Ip | nucleus (1040)                | GFP    | L       | 7/14          | 36(99.6)     | 3558.5    | 6.69     | 1e-10  |

Submit to FunSpec Submit to GO Term Finder

SPT16(YGL207W) bound to the following proteins as a prey.

| Gene Name | ORF Name | SGD Description                                                                                                                                                        | Localization (Molecules/Cell) | Source | L_Score | #Peptides (%) | Sum of score | Max_Maldi | Homologs | Links |
|-----------|----------|------------------------------------------------------------------------------------------------------------------------------------------------------------------------|-------------------------------|--------|---------|---------------|--------------|-----------|----------|-------|
| SPT16     | YGL207W  | global regulator of transcription                                                                                                                                      | nucleus (18500)               | GFP    | L       | 11/61         | 291(99.6)    | 28927.2   | 4.56     | 0     |
| HTA2      | YBL003C  | Histone H2A (HTA1 and HTA2 code for nearly identical proteins)                                                                                                         | nucleus (32100)               | GFP    | L       | 7/61          | 45(99.6)     | 4466.2    | 4.44     | 3e-40 |
| PAF1      | YBR279W  | RNA polymerase II-associated, nuclear protein that may serve as both a positive and negative regulator of a subset of genes, perhaps operating in parallel with Gal1Ip | nucleus (1040)                | GFP    | L       | 3/61          | 20(99.6)     | 1992.0    | 3.91     | 1e-10 |

| Band number | Gene Name | Orf Name | SGD Description                                                                                               | SGD Gene Product          | Final_score |
|-------------|-----------|----------|---------------------------------------------------------------------------------------------------------------|---------------------------|-------------|
| 1           | CHD1      | YER164W  | Sole S. cerevisiae member of CHD gene family containing Chromodomain, Helicase domain, and DNA-binding domain | transcriptional regulator | 1.95        |
| 2           | SPT16     | YGL207W  | global regulator of transcription                                                                             |                           | 4.08        |
| 3           | SPT16     | YGL207W  | global regulator of transcription                                                                             |                           | 4.48        |
| 4           | CTR9      | YOL145C  | CTR9 is required for normal CLN1 and CLN2 G1 cyclin expression                                                |                           | 1.83        |
| 5           | YMR247C   | YMR247C  |                                                                                                               |                           | 0.44        |
| 6           | SPT16     | YGL207W  | global regulator of transcription                                                                             |                           | 4.46        |
| 7           | CTR9      | YOL145C  | CTR9 is required for normal CLN1 and CLN2 G1 cyclin expression                                                |                           | 2.63        |
| 8           | SPT16     | YGL207W  | global regulator of transcription                                                                             |                           | 4.19        |
| 9           | SPT16     | YGL207W  | global regulator of transcription                                                                             |                           | 2.88        |
| 10          | CTF19     | YPL018W  | Chromosome Transmission Fidelity                                                                              | kinetochore protein       | 1.8         |

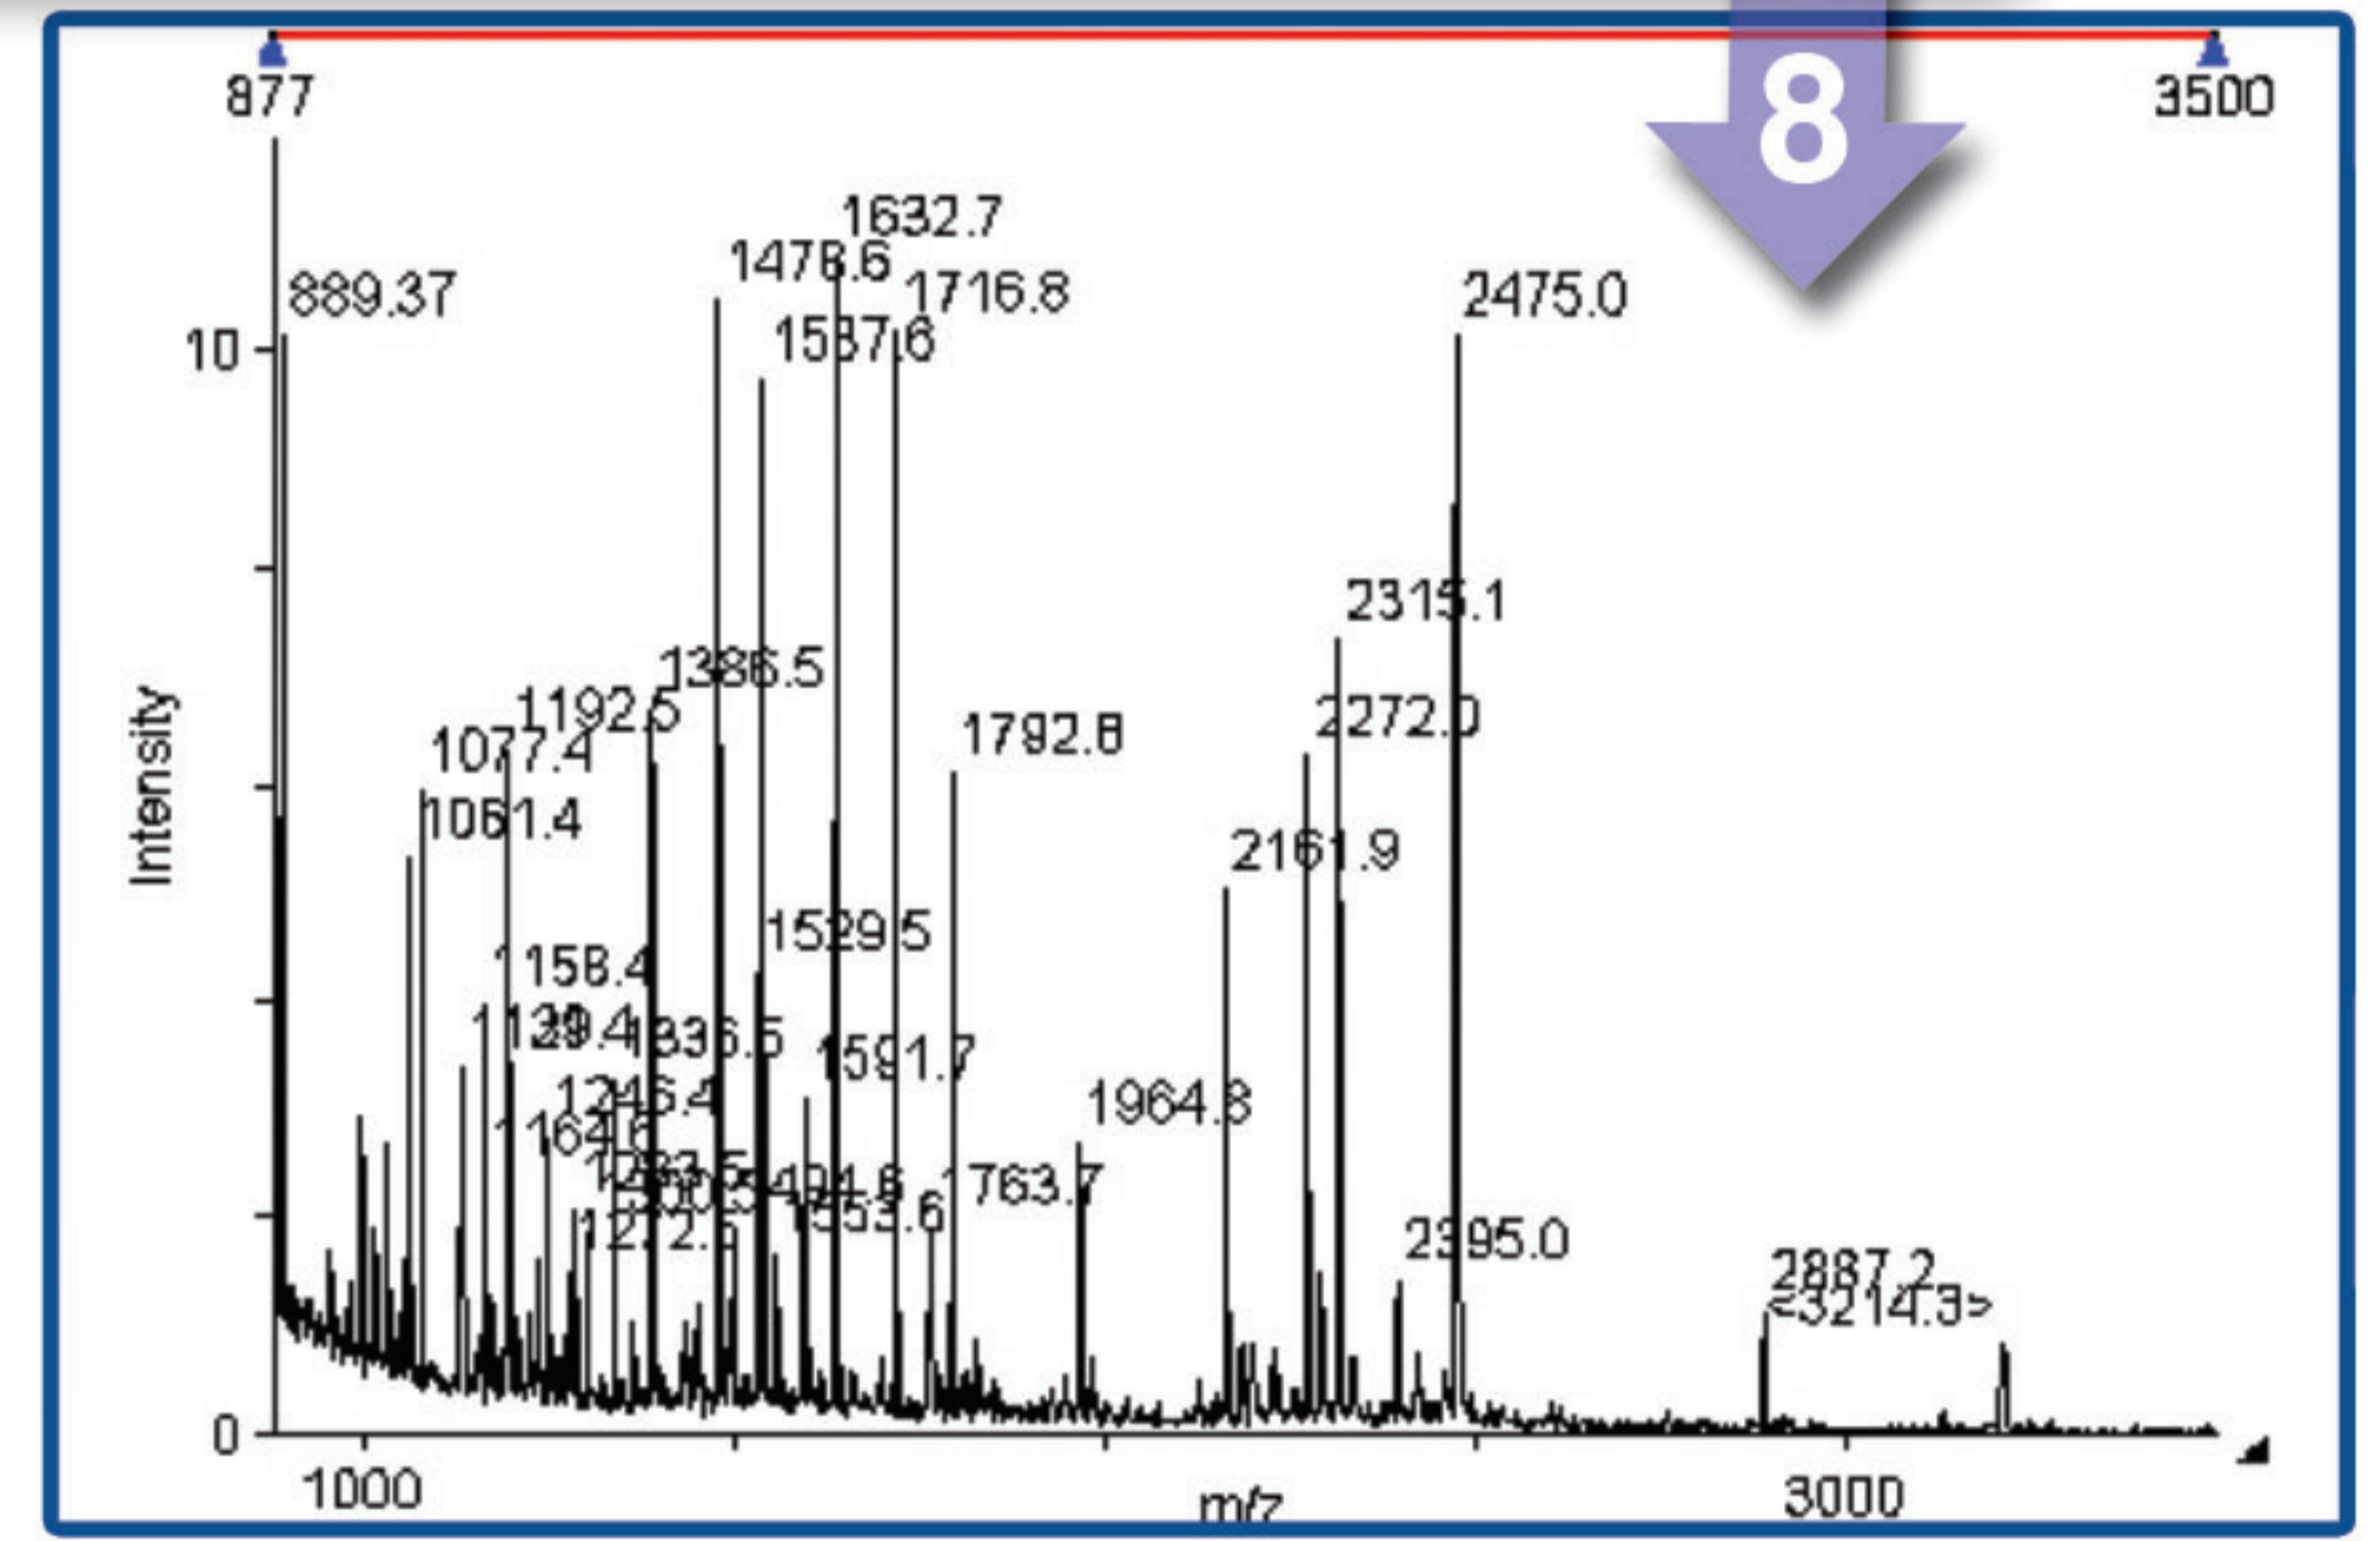

LC-MS/MS Data  
LC-MS/MS data for bait SPT16(YGL207W)

| Gene Name | ORF Name | SGD Description                   | GO Annotation                                                                                                              | Links             |
|-----------|----------|-----------------------------------|----------------------------------------------------------------------------------------------------------------------------|-------------------|
| SPT16     | YGL207W  | global regulator of transcription | P RNA elongation from Pol II promoter<br>P chromatin modeling<br>P regulation of global transcription from Pol II promoter | SGD MIPS YPD SIMS |

Bait Common protein

DB 13 AS180303 284 23,24 DTASelect COMBINED.html

| Gene Name | ORF Name | SGD Description                                            | SGD Gene Product                                         | Number of peptides | Probability | Ambiguous | Cross Contamination | Links             |
|-----------|----------|------------------------------------------------------------|----------------------------------------------------------|--------------------|-------------|-----------|---------------------|-------------------|
| SPT16     | YGL207W  | global regulator of transcription                          |                                                          | 36                 | 99.6        | No        | No                  | SGD MIPS YPD SIMS |
| POB3      | YML069W  | binds to catalytic subunit of DNA polymerase alpha (PolIp) | DNA polymerase delta binding protein                     | 31                 | 99.6        | No        | No                  | SGD MIPS YPD SIMS |
| STO1      | YMR125W  | Large subunit of the nuclear cap-binding protein complex   | Large subunit of the nuclear cap-binding protein complex | 3                  | 99.6        | No        | No                  | SGD MIPS YPD SIMS |

SIMS SUMMARY

View SEQUEST-STATQUEST-SIMS Summary

SIMS

| No | File name         | Confidence | Xcorr  | DSeq   | Sequence       | Locus   | Links               | PS  | PSRank | Int  | DV |
|----|-------------------|------------|--------|--------|----------------|---------|---------------------|-----|--------|------|----|
|    | 23,24.0330.0330.1 | 0.999      | 3.6135 | 0.4735 | KALADWQQDKL    | YGL207W | TAP SGD MIPS YPD QD | 470 | 1      | 5/10 |    |
|    | 23,24.0335.0335.1 | 0.981      | 1.7589 | 0.1880 | KALADWQQD      | YGL207W | TAP SGD MIPS YPD QD | 363 | 1      | 5/8  |    |
|    | 23,24.0380.0380.1 | 0.999      | 2.6705 | 0.1920 | RFLIDPSEEMAN.N | YGL207W | TAP SGD MIPS YPD QD | 110 | 1      | 2/12 |    |
|    | 23,24.1324.1324.1 | 0.997      | 2.4184 | 0.3648 | LNIDFDVFK.K    | YGL207W | TAP SGD MIPS YPD QD | 107 | 2154   | 1/8  |    |
|    | 23,24.1384.1384.1 | 0.997      | 2.4432 | 0.2613 | KEVESVIEVEKT   | YGL207W | TAP SGD MIPS YPD QD | 76  | 1816   | 1/12 |    |

Spectrum Key:

| Unique | Filename                       | XCorr  | DeltaCN | Precursor | M+H+ Mass | Rank by Sp | Ion Proportion | Copies | Sequence            |
|--------|--------------------------------|--------|---------|-----------|-----------|------------|----------------|--------|---------------------|
| 13     | AS180303_284_23,24.0519.0519.1 | 0.9272 | 0.0695  | 843.39    | 196       | 4170.04    | 1              |        | L.DETEPPR.F         |
| 13     | AS180303_284_23,24.1669.1669.1 | 1.0074 | 8.0E-4  | 626.55    | 26        | 5000.04    | 1              |        | Q.LYNGNC.I          |
| 13     | AS180303_284_23,24.0951.0951.1 | 2.7166 | 0.1751  | 1418.37   | 1         | 6500.04    | 1              |        | F.YFNNEEDNNK.K      |
| 13     | AS180303_284_23,24.0845.0845.1 | 1.5954 | 0.1499  | 798.5     | 4         | 6670.04    | 1              |        | K.VPSKPR.N          |
| 13     | AS180303_284_23,24.1125.1125.1 | 2.3545 | 0.3054  | 1086.51   | 1         | 6670.04    | 1              |        | K.ALADVVQDK.L       |
| 13     | AS180303_284_23,24.1397.1397.1 | 1.6087 | 0.0562  | 797.58    | 6         | 8000.04    | 2              |        | R.IHVDWK.S          |
| 13     | AS180303_284_23,24.1021.1021.1 | 1.3739 | 0.0972  | 743.55    | 5         | 7500.04    | 1              |        | K.TVGIPEK.D         |
| 13     | AS180303_284_23,24.0987.0987.1 | 1.5357 | 0.0666  | 957.4     | 56        | 5000.04    | 1              |        | K.DFNKPVTH.I        |
| 13     | AS180303_284_23,24.1134.1134.2 | 3.9346 | 0.2516  | 1925.68   | 1         | 7140.04    | 1              |        | R.RYGDEDELEQEER.R   |
| 13     | AS180303_284_23,24.1327.1327.1 | 0.9751 | 0.0956  | 649.28    | 91        | 5000.04    | 1              |        | R.VPSTVF.I          |
| 13     | AS180303_284_23,24.1418.1418.1 | 0.8619 | 0.0795  | 587.48    | 31        | 5000.04    | 1              |        | K.NPILM.G           |
| 13     | AS180303_284_23,24.0517.0517.1 | 1.868  | 0.1809  | 991.23    | 4         | 6500.04    | 1              |        | F.NSPGSSGGISK.K     |
| 13     | AS180303_284_23,24.1422.1422.1 | 1.7291 | 0.1891  | 1288.49   | 1         | 5000.04    | 1              |        | D.AIAEASNGLLTVE.N   |
| 13     | AS180303_284_23,24.0545.0545.1 | 0.9877 | 0.1182  | 1200.37   | 159       | 2270.04    | 1              |        | S.AADANGDPSEPR.Q    |
| 13     | AS180303_284_23,24.1697.1697.1 | 1.8204 | 0.1783  | 997.67    | 1         | 7140.04    | 1              |        | L.NIDFDVFK.K        |
| 13     | AS180303_284_23,24.1923.1923.1 | 2.6245 | 0.1394  | 1475.51   | 1         | 5770.04    | 1              |        | K.LFDDVIALDINSAGK.T |
| 13     | AS180303_284_23,24.0447.0447.1 | 1.875  | 0.15    | 1060.36   | 46        | 3890.04    | 3              |        | A.DANGDPSEPR.Q      |
| 13     | AS180303_284_23,24.1585.1585.1 | 1.3715 | 0.1667  | 927.3     | 8         | 6430.04    | 1              |        | L.SYEFPATL.I        |

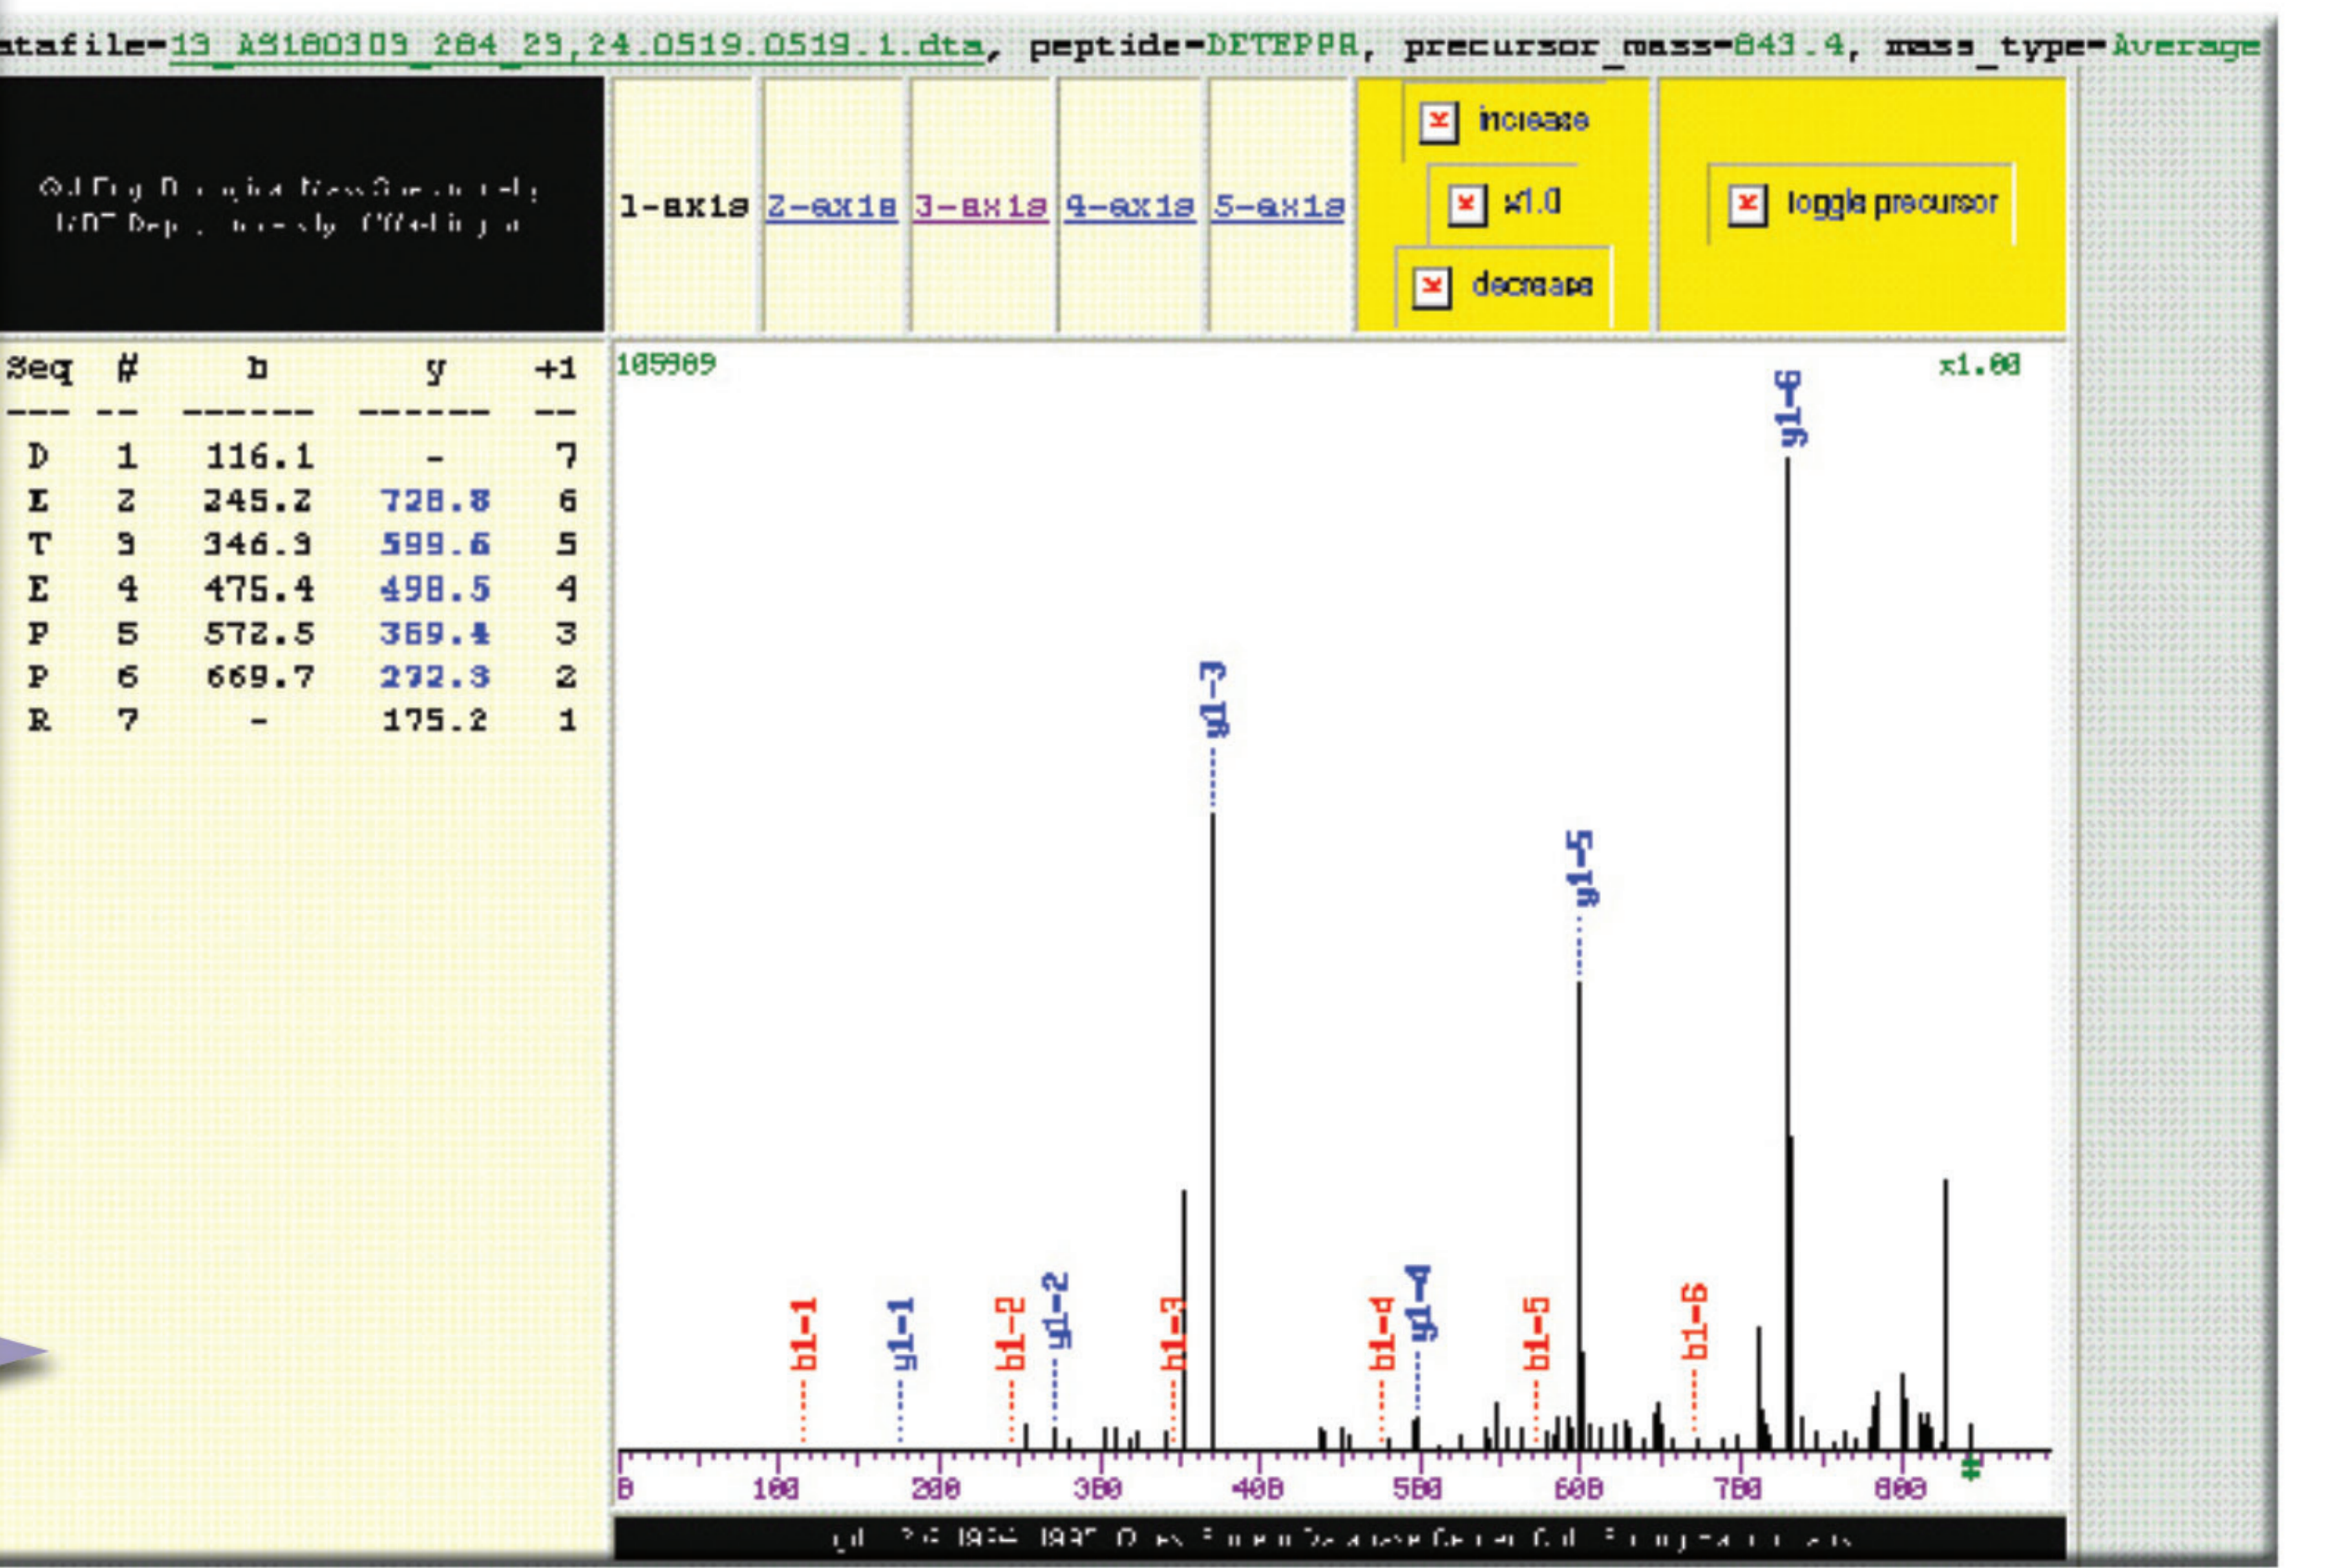

Figure S6. A comprehensive database of the yeast interactome (<http://tap.med.utoronto.ca/>). Querying of a protein name (1) leads to an interaction view summarizing the results of all purifications involving the queried protein, as well as links to YPD, SGD, MIPS and BioGRID databases. Links from this table lead to details of the LC/MS/MS (2) or MALDI-TOF (6 and 7) experiments. From the LC/MS/MS page, mass spectrum search algorithm scores (2 and 3) and spectral images (5) can be retrieved, in addition to results from SIMS site-specific modification searches (4). Similarly, the link to the MALDI-TOF data allows for retrieval of search algorithm scores (7), silver-stained gels (6) and spectral images (8).
